# Supplementary material for: Estimating nearshore coral reef-associated fisheries production from the main Hawaiian Islands
Source: PLOS journal article supplement (doi:10.1371/journal.pone.0195840), 2018-04-16
Supplement: S4 (10.1371/journal.pone.0195840.s004) [file journal.pone.0195840.s004]

**S4 Table. Main Hawaiian Islands creel survey information.**

| Location  | Island | Month/Year      | Duration | Coastline (km) | Organization                                        | Source                                                                                                                                                                                                                                                                                                                                                        |
|-----------|--------|-----------------|----------|----------------|-----------------------------------------------------|---------------------------------------------------------------------------------------------------------------------------------------------------------------------------------------------------------------------------------------------------------------------------------------------------------------------------------------------------------------|
| Kahekili  | Maui   | 1/2011-12/2011  | 1 year   | ~ 3            | HCFRU, UH; HDAR                                     | Friedlander AM, Koike H, Kekoa L, Sparks R. Design, development, and implementation of a survey of the fisheries of the Kahekili Herbivore Fisheries Management Area. 2011.                                                                                                                                                                                   |
| Wailuku   | Maui   | 3/2013 - 8/2013 | 5 months | ~3.5           | FERL UH; Wailuku Community Managaed Makai Area      | Koike H, Carpio J, Friedlander AM. Final Creel Survey Report for Wailuku Community Management Area, Maui County, Hawaii. 2014.                                                                                                                                                                                                                                |
| Haena     | Kauai  | 12/2009-12/2010 | 1 year   | 3.8            | Makai Watch Ha'ena; FERL, UH                        | Raw data                                                                                                                                                                                                                                                                                                                                                      |
| Hanalei   | Kauai  | 7/1992-12/1993  | ~1 year  | ~ 4.8          | HCFRU, UH; HDAR                                     | Everson A, Friedlander AM. Catch, Effort, and Yields for Coral Reef Fisheries in Kaneohe Bay, Oahu and Hanalei Bay, Kauai: Comparison between a large urban and small rural embayment. Status of Hawaii's Coastal Fisheries in the New Millennium: Proceedings of the 2001 Fisheries Symposium American Fisheries Society, Hawaii Chapter. 2001. pp. 108–128. |
| Kiholo    | Hawaii | 4/2012-5/2013   | 1 year   | ~4.7           | HCFRU, UH; Alaka'i Consulting LLC; Hui Aloha Kiholo | Kittinger JN, Teneva LT, Koike H, Stamoulis KA, Kittinger DS, Oleson KLL, et al. From reef to table: Social and ecological factors affecting coral reef fisheries, artisanal seafood supply chains, and seafood security. PLoS One. 2015;10: 1–24. doi:10.1371/journal.pone.0123856                                                                           |
| Kaupulehu | Hawaii | 8/2013-11/2013  | 3 months | 3.5            | FERL, UH; TNC                                       | Koike H, Wiggins C, Most R, Conklin E, Minton D, Friedlander AM. Final Creel Survey Report for Ka'ūpūlehu Creel Survey Project, North Kona, Hawai'i Island. 2015.                                                                                                                                                                                             |
| Puako     | Hawaii | 12/2008-12/2009 | 1 year   | 3.6            | UH, TNC                                             | Raw data                                                                                                                                                                                                                                                                                                                                                      |

|                           |      |                 |                |                        |                                              |                                                                                                                                                                                                                                                                                                                                                               |
|---------------------------|------|-----------------|----------------|------------------------|----------------------------------------------|---------------------------------------------------------------------------------------------------------------------------------------------------------------------------------------------------------------------------------------------------------------------------------------------------------------------------------------------------------------|
| Maunalua                  | Oahu | 12/2007-11/2008 | 1 year         | 11                     | TNC; FERL, UH                                | Raw data                                                                                                                                                                                                                                                                                                                                                      |
| Waikiki                   | Oahu | 6/1998-8/2001   | 2 years, 2 mo. | 7                      | UH                                           | Meyer CG. An empirical evaluation of the design and function of a small marine reserve. University of Hawaii at Manoa. 2003.                                                                                                                                                                                                                                  |
| Kaneohe Bay               | Oahu | 1991 - 1992     | 1 year         | 12.8                   | NOAA PIFSC; NOAA NOS; OI                     | Everson A, Friedlander AM. Catch, Effort, and Yields for Coral Reef Fisheries in Kaneohe Bay, Oahu and Hanalei Bay, Kauai: Comparison between a large urban and small rural embayment. Status of Hawaii's Coastal Fisheries in the New Millennium: Proceedings of the 2001 Fisheries Symposium American Fisheries Society, Hawaii Chapter. 2001. pp. 108-128. |
| Kaneohe Marine Corps Base | Oahu | Feb-11          | 1 month        | 7 sites across 12.5 km | Pono Pacific Land Management LLC; NOAA PIFSC | Carnevale M, Allen S. Preliminary Assessment Concerning both the Shoreline Fishing Perceptions and the Quantitative Shoreline Fishing Effort, Harvest, and Catch at Marine Corps Base Hawaii; Kaneohe, Hawaii. 2011.                                                                                                                                          |

Survey site locations, time frame, duration, length of coastline surveyed, organization that conducted the surveys, and source. TNC (The Nature Conservancy), FERL (Fisheries Ecology Research Lab), UH (University of Hawaii), NOAA (National Oceanic and Atmospheric Administration), PIFSC (Pacific Islands Fisheries Science Center), NOS (National Ocean Service), OI (The Oceanic Institute), HDAR (Hawaii's Division of Aquatic Resources), HCFRU (Hawaii Cooperative Fishery Research Unit). The above information is a condensed version of information provided in [1], which collated and synthesized data from the 11 creel survey programs conducted in MHI, for which comparable data were available.

## References

1. McCoy KS. Estimating nearshore fisheries catch for the Main Hawaiian Islands. University of Hawaii at Manoa, MSc Thesis. 2015.
